# Supplementary material for: Selective adsorption of globulin on nanofiber meshes for immunoadsorption therapy
Source: Royal Society of Chemistry journal article supplement (doi:10.1039/c7nj04672c), 2018-01-01
Supplement: c7nj04672c1.pdf [file c7nj04672c1.pdf]

## **Supporting Information**

Selective Adsorption of Globulin on Nanofiber Meshes for Immunoabsorption Therapy

Rio Kurimoto<sup>a,b</sup>, Koki Namekawa<sup>b,c</sup>, Amanda V Ellis<sup>d</sup>, Masanobu Naito<sup>a,e</sup>, and  
Mitsuhiro Ebara<sup>a,b,f</sup>

<sup>a</sup> *Graduate School of Pure and Applied Sciences, University of Tsukuba, 1-1-1 Tennodai,  
Tsukuba, Ibaraki 305-8577, Japan.*

<sup>b</sup> *International Center for Materials Nanoarchitectonics (MANA), National Institute for  
Materials Science (NIMS), 1-1 Namiki, Tsukuba, Ibaraki 305-0044, Japan.*

<sup>c</sup> *Department of Medical and General Sciences, Nihon Institute of Medical Science, 1276  
Shimokawara, Moroyamamachi, Irumagun, Saitama 350-0435 Japan.*

<sup>d</sup> *School of Chemical and Biomedical Engineering, University of Melbourne, Parkville,  
Victoria 3010, Australia.*

<sup>e</sup> *Research Center for Structural Materials, National Institute for Materials Science  
(NIMS), 1-2-1 Sengen, Tsukuba, Ibaraki 305-0047, Japan.*

<sup>f</sup> *Graduate School of Industrial Science and Technology, Tokyo University of Science, 6-  
3-1 Niijuku, Katsushika-ku, Tokyo 125-8585, Japan*

**Fig. S1** SEM images of EVOH films (scale bar: 10  $\mu\text{m}$ )

**Fig. S2** FTIR spectra of various the EVOH nanofiber meshes (a) and films (b) modified with MA

**Fig. S3** FTIR spectra of the EVOH nanofiber meshes modified with various MA concentrations

**Fig. S4**  $^1\text{H-NMR}$  spectra of the MA-modified EVOH nanofiber meshes

**Fig. S5** The fitting curves of (a) Langmuir and (b) Freundlich isotherm models for  $\gamma$ -globulin adsorption on the MA-modified EVOH nanofiber mesh.

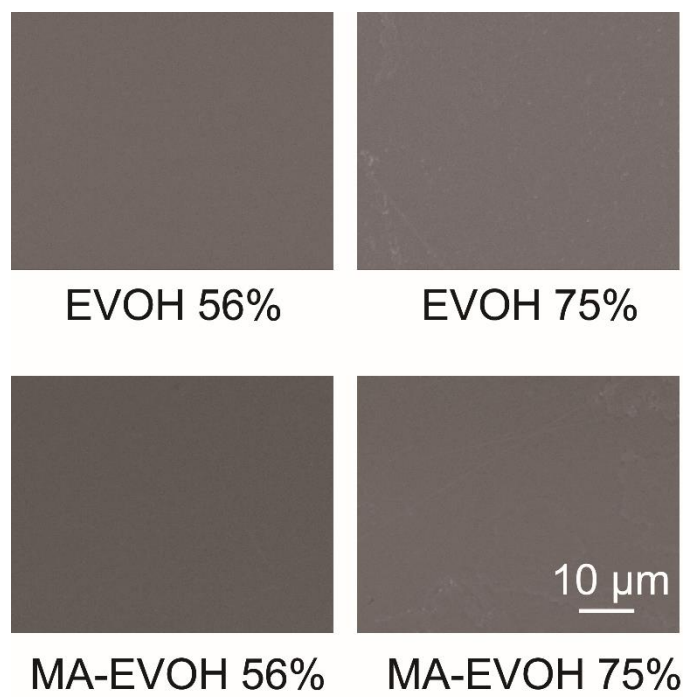

**Fig. S1**

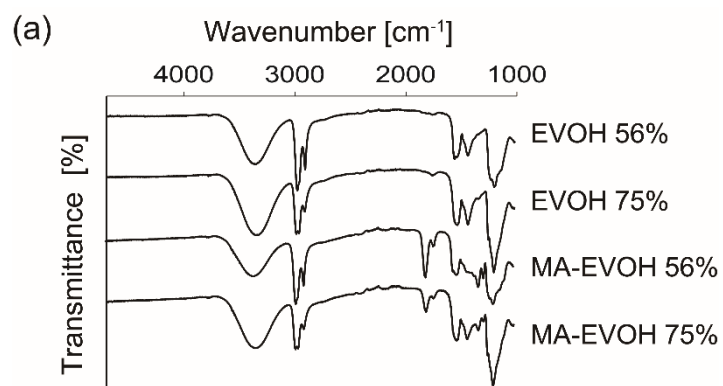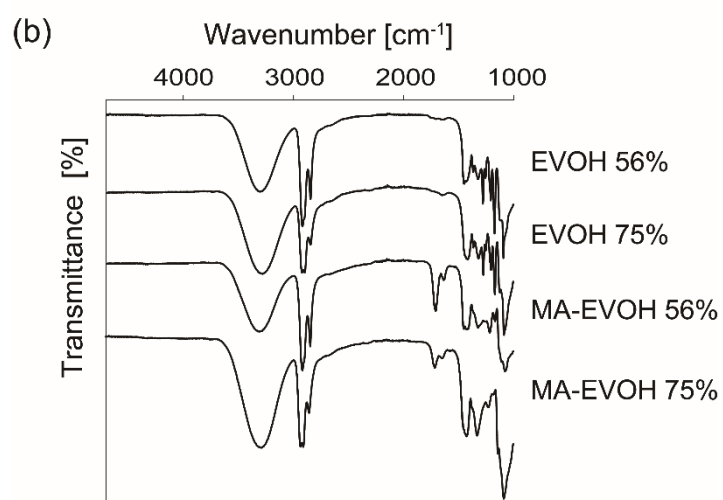

**Fig. S2**

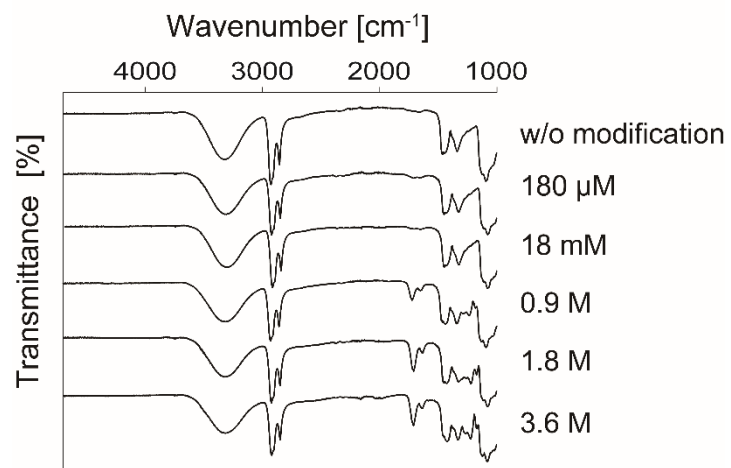

**Fig. S3**

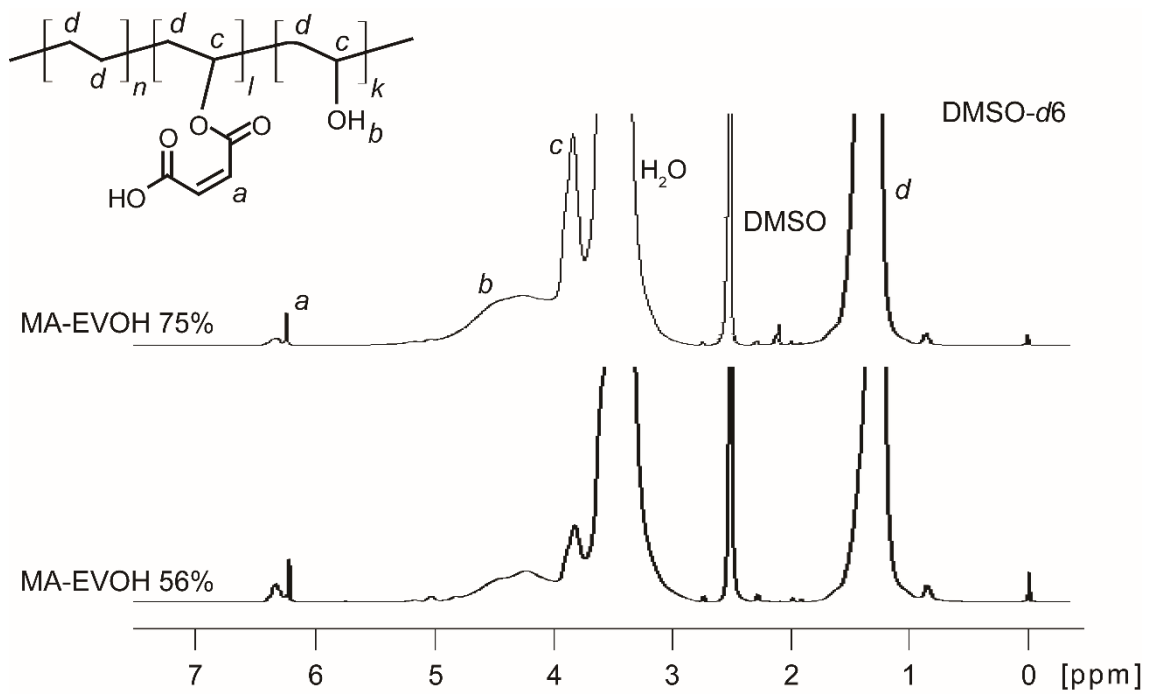

**Fig. S4**

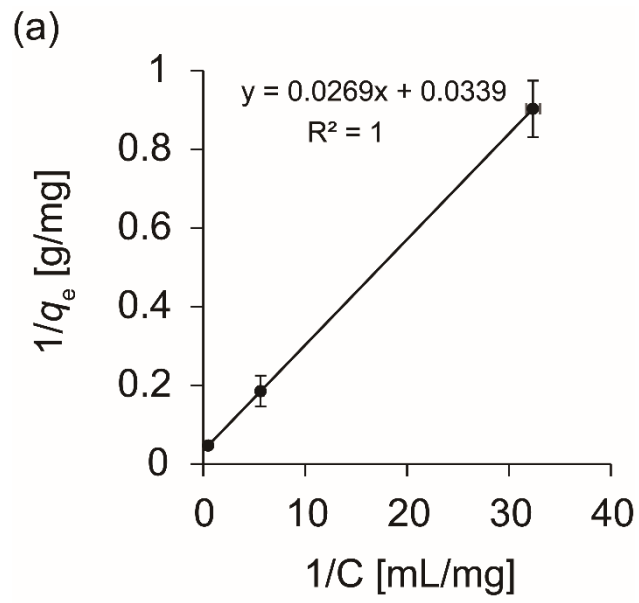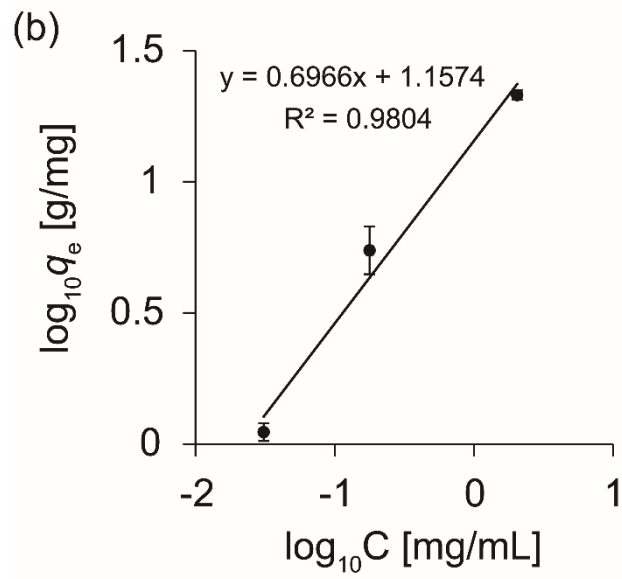

Fig. S5
